# Supplementary material
Source: PubMed Central journal article supplement (PMC3528829)
Supplement: NIHMS402308-supplement-Supp_Fig_S1-S3.pdf [file NIHMS402308-supplement-Supp_Fig_S1-S3.pdf]

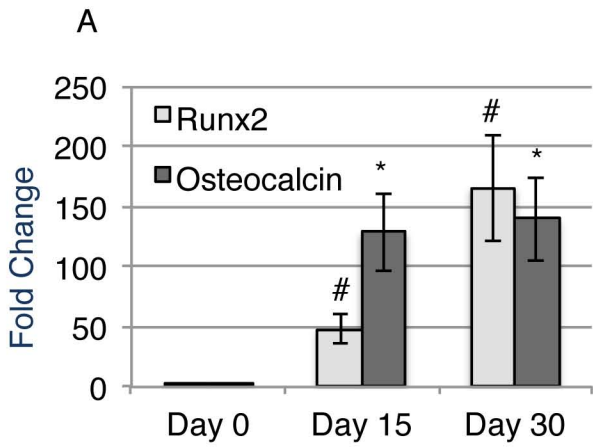

\*p<0.01 compared to Day 0  
#p<0.01 compared to Day 0

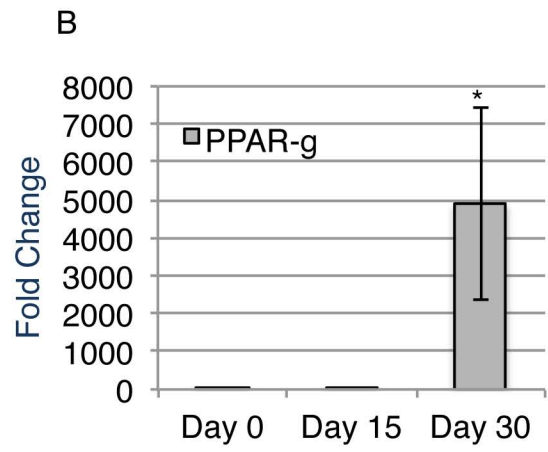

\*p<0.01 compared to Day 0

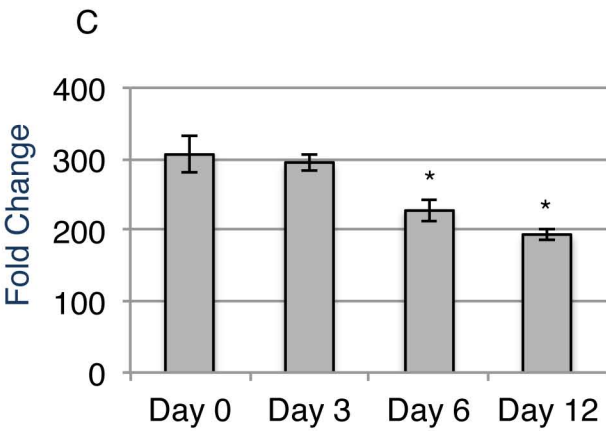

\*p<0.01 compared to Day 0

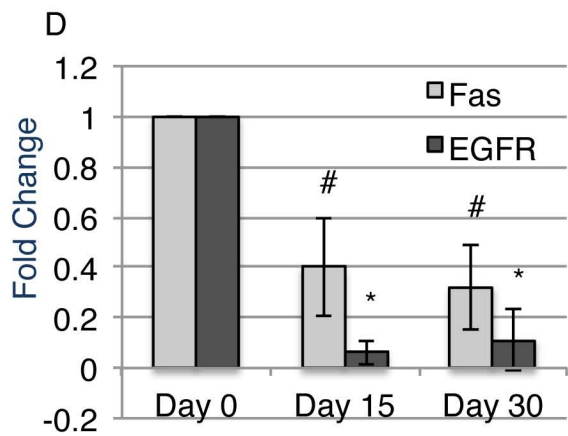

\*p<0.01 compared to Day 0  
#p<0.01 compared to Day 0

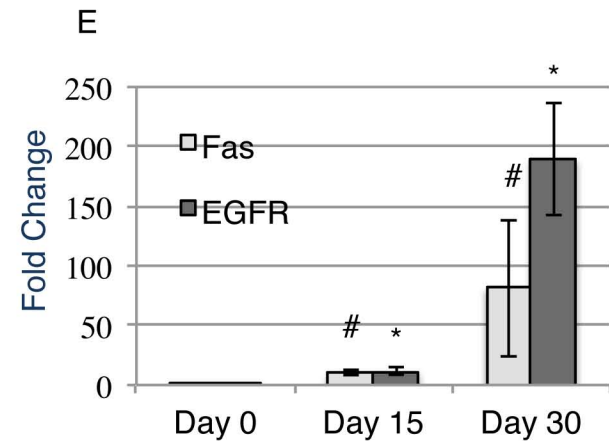

\*p<0.05 compared to Day 0  
#p<0.05 compared to Day 0

**A****Day 15**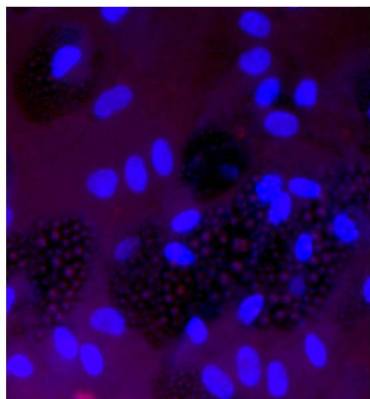

0 hr

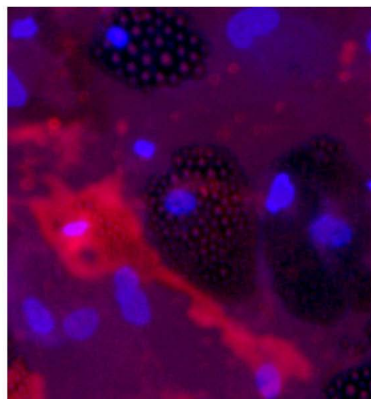

12 hr

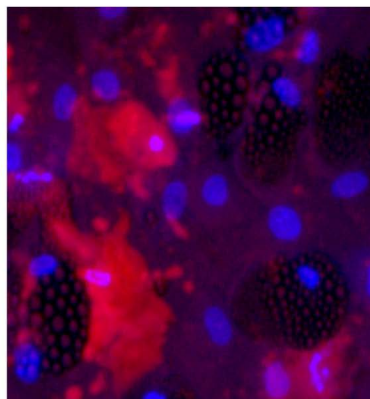

24 hr

**B****Day 30**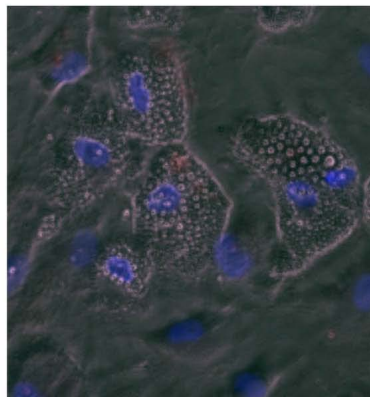

0 hr

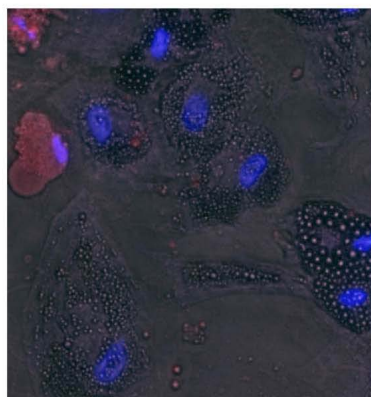

12 hr

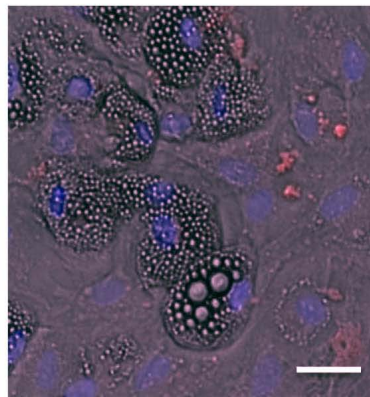

24 hr

**A**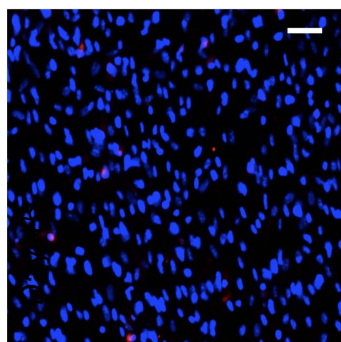

0 hr

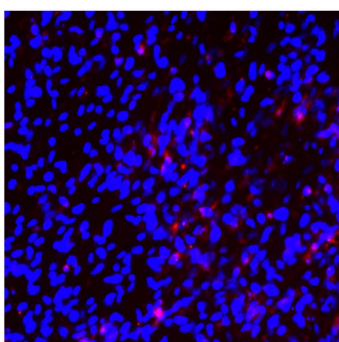

2 hr

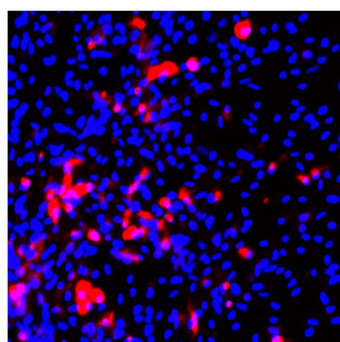

4 hr

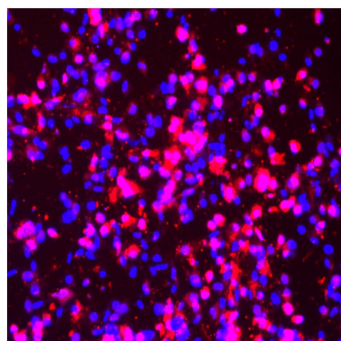

6 hr

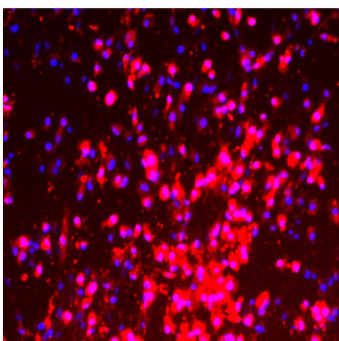

8 hr

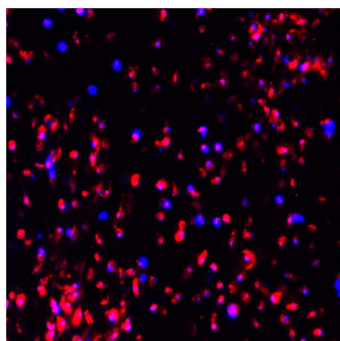

12 hr

**B**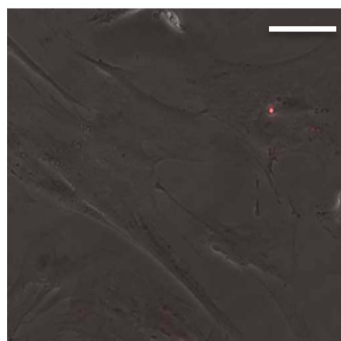

0 hr

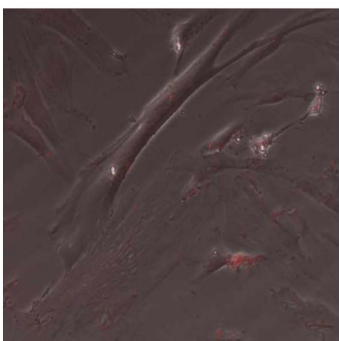

2 hr

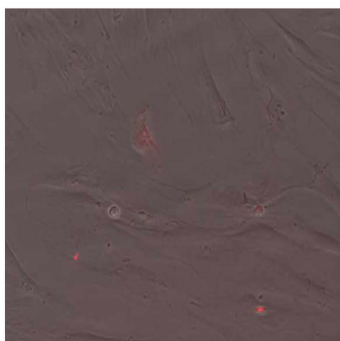

4 hr

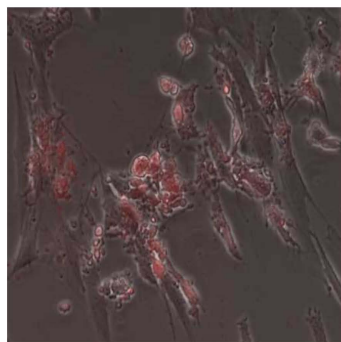

6 hr

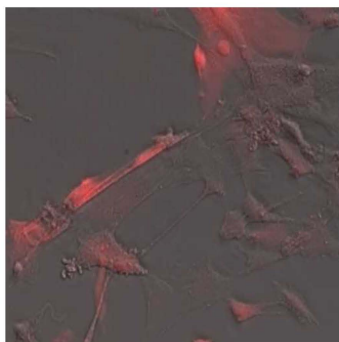

8 hr

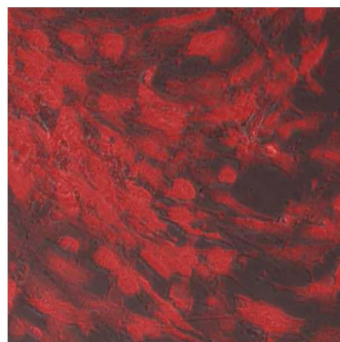

12 hr
